# Supplementary material for: The HV3 Score: A New Simple Tool to Suspect Cognitive Impairment in Multiple Sclerosis in Clinical Practice
Source: Springer Nature journal article supplement (doi:10.1007/s40120-014-0021-x), 2014-11-25
Supplement: MOESM1 [file 9339500]

- Cognitive impairment in multiple sclerosis (MS) is common but its evaluation is time consuming; our objective was to improve early detection of cognitive impairment in MS.
- Global brain atrophy was evaluated by using the third-ventricle (V3) width (in mm).
- A composite score, named HV3, was obtained by adding the EDSS and V3-width and correlated with the results at the Paced Auditory Serial Addition Test (PASAT).
- A cutoff HV3 score over 5.5 identified patients with low PASAT performance.
- The HV3 score is an additional and complementary tool, accessible in clinical practice, to suspect easily cognitive impairment in patients with MS and to better identify patients requiring a complete cognitive assessment.

This summary slide represents the opinions of the authors. No funding or sponsorship was received for this study or publication of this article. For a full list of acknowledgments and conflicts of interest for all authors of this article, please see the full text online. Copyright © The Author(s) 2014. Creative Commons Attribution Noncommercial License (CC BY-NC).
